# Supplementary material
Source: Springer Nature journal article supplement (https://www.springermedizin.de/resource/supplementary/13012_2006_17_MOESM1_ESM.pdf/9628898)

Assess Barriers & Facilitators + Monitor Interventions + Evaluate Outcomes & Monitor Degree of Use

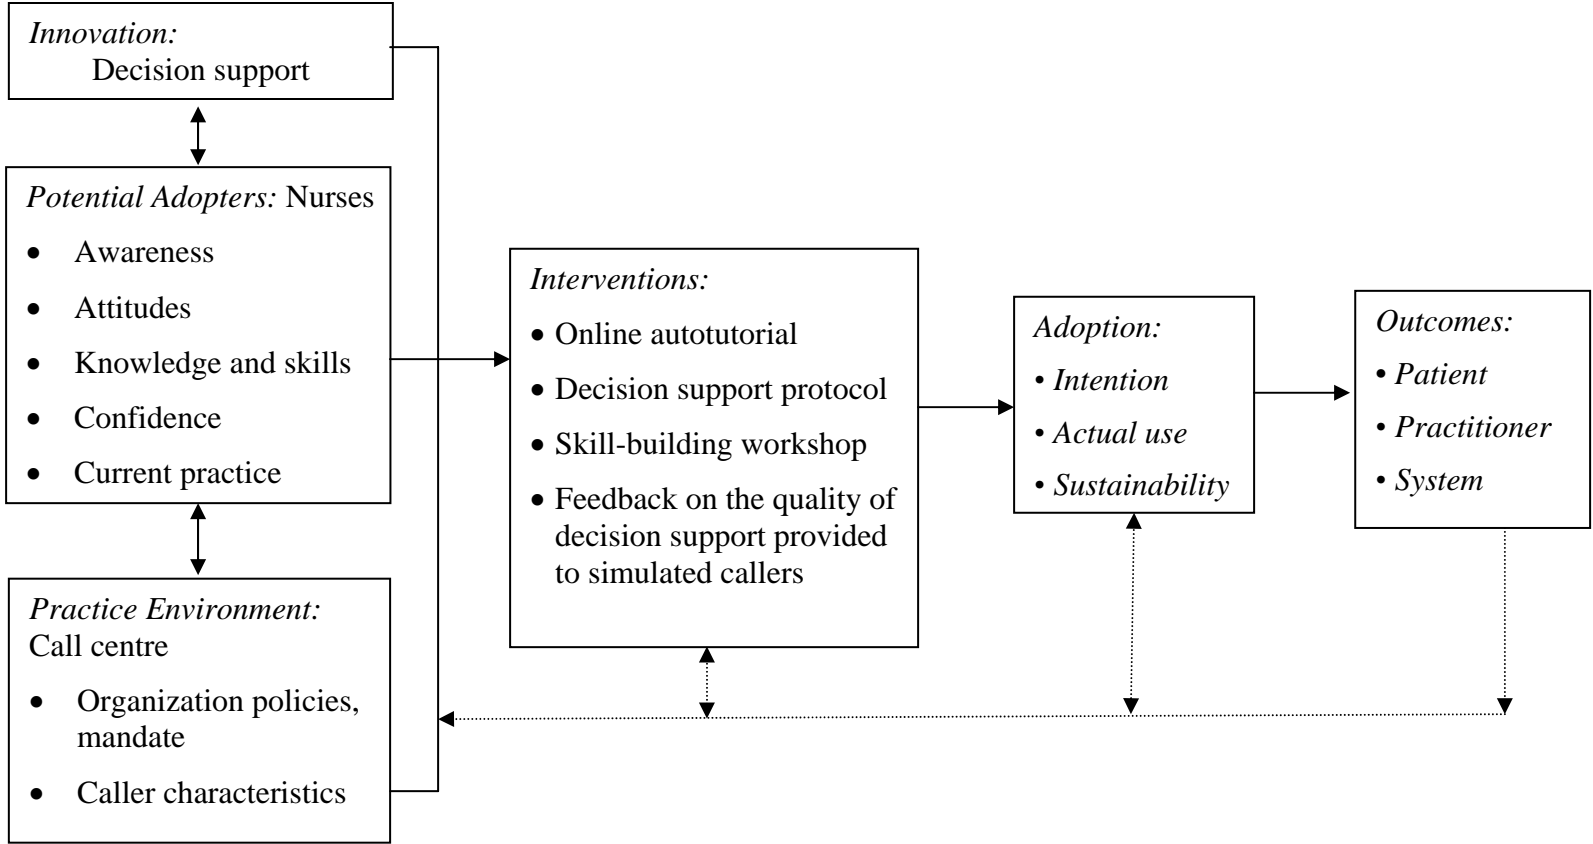

Supplement: MOESM1 [file 9628898]
